# Supplementary material
Source: publisher figshare collection journal article supplement (https://tandf.figshare.com/ndownloader/files/21188898)
Supplement: Supplementary file 1 [file 21188898]

**Supplementary Information**

Novel coordination compounds: Mn(II), Co(II), Ni(II), Cu(II) and Zn(II) cations with acesulfame/*N,N*-diethylnicotinamide ligands

TUĞRUL YILDIRIM, DURSUN ALI KÖSE*, GÜLÇIN ALP AVCI, ONUR ŞAHIN and FATIH AKKURT


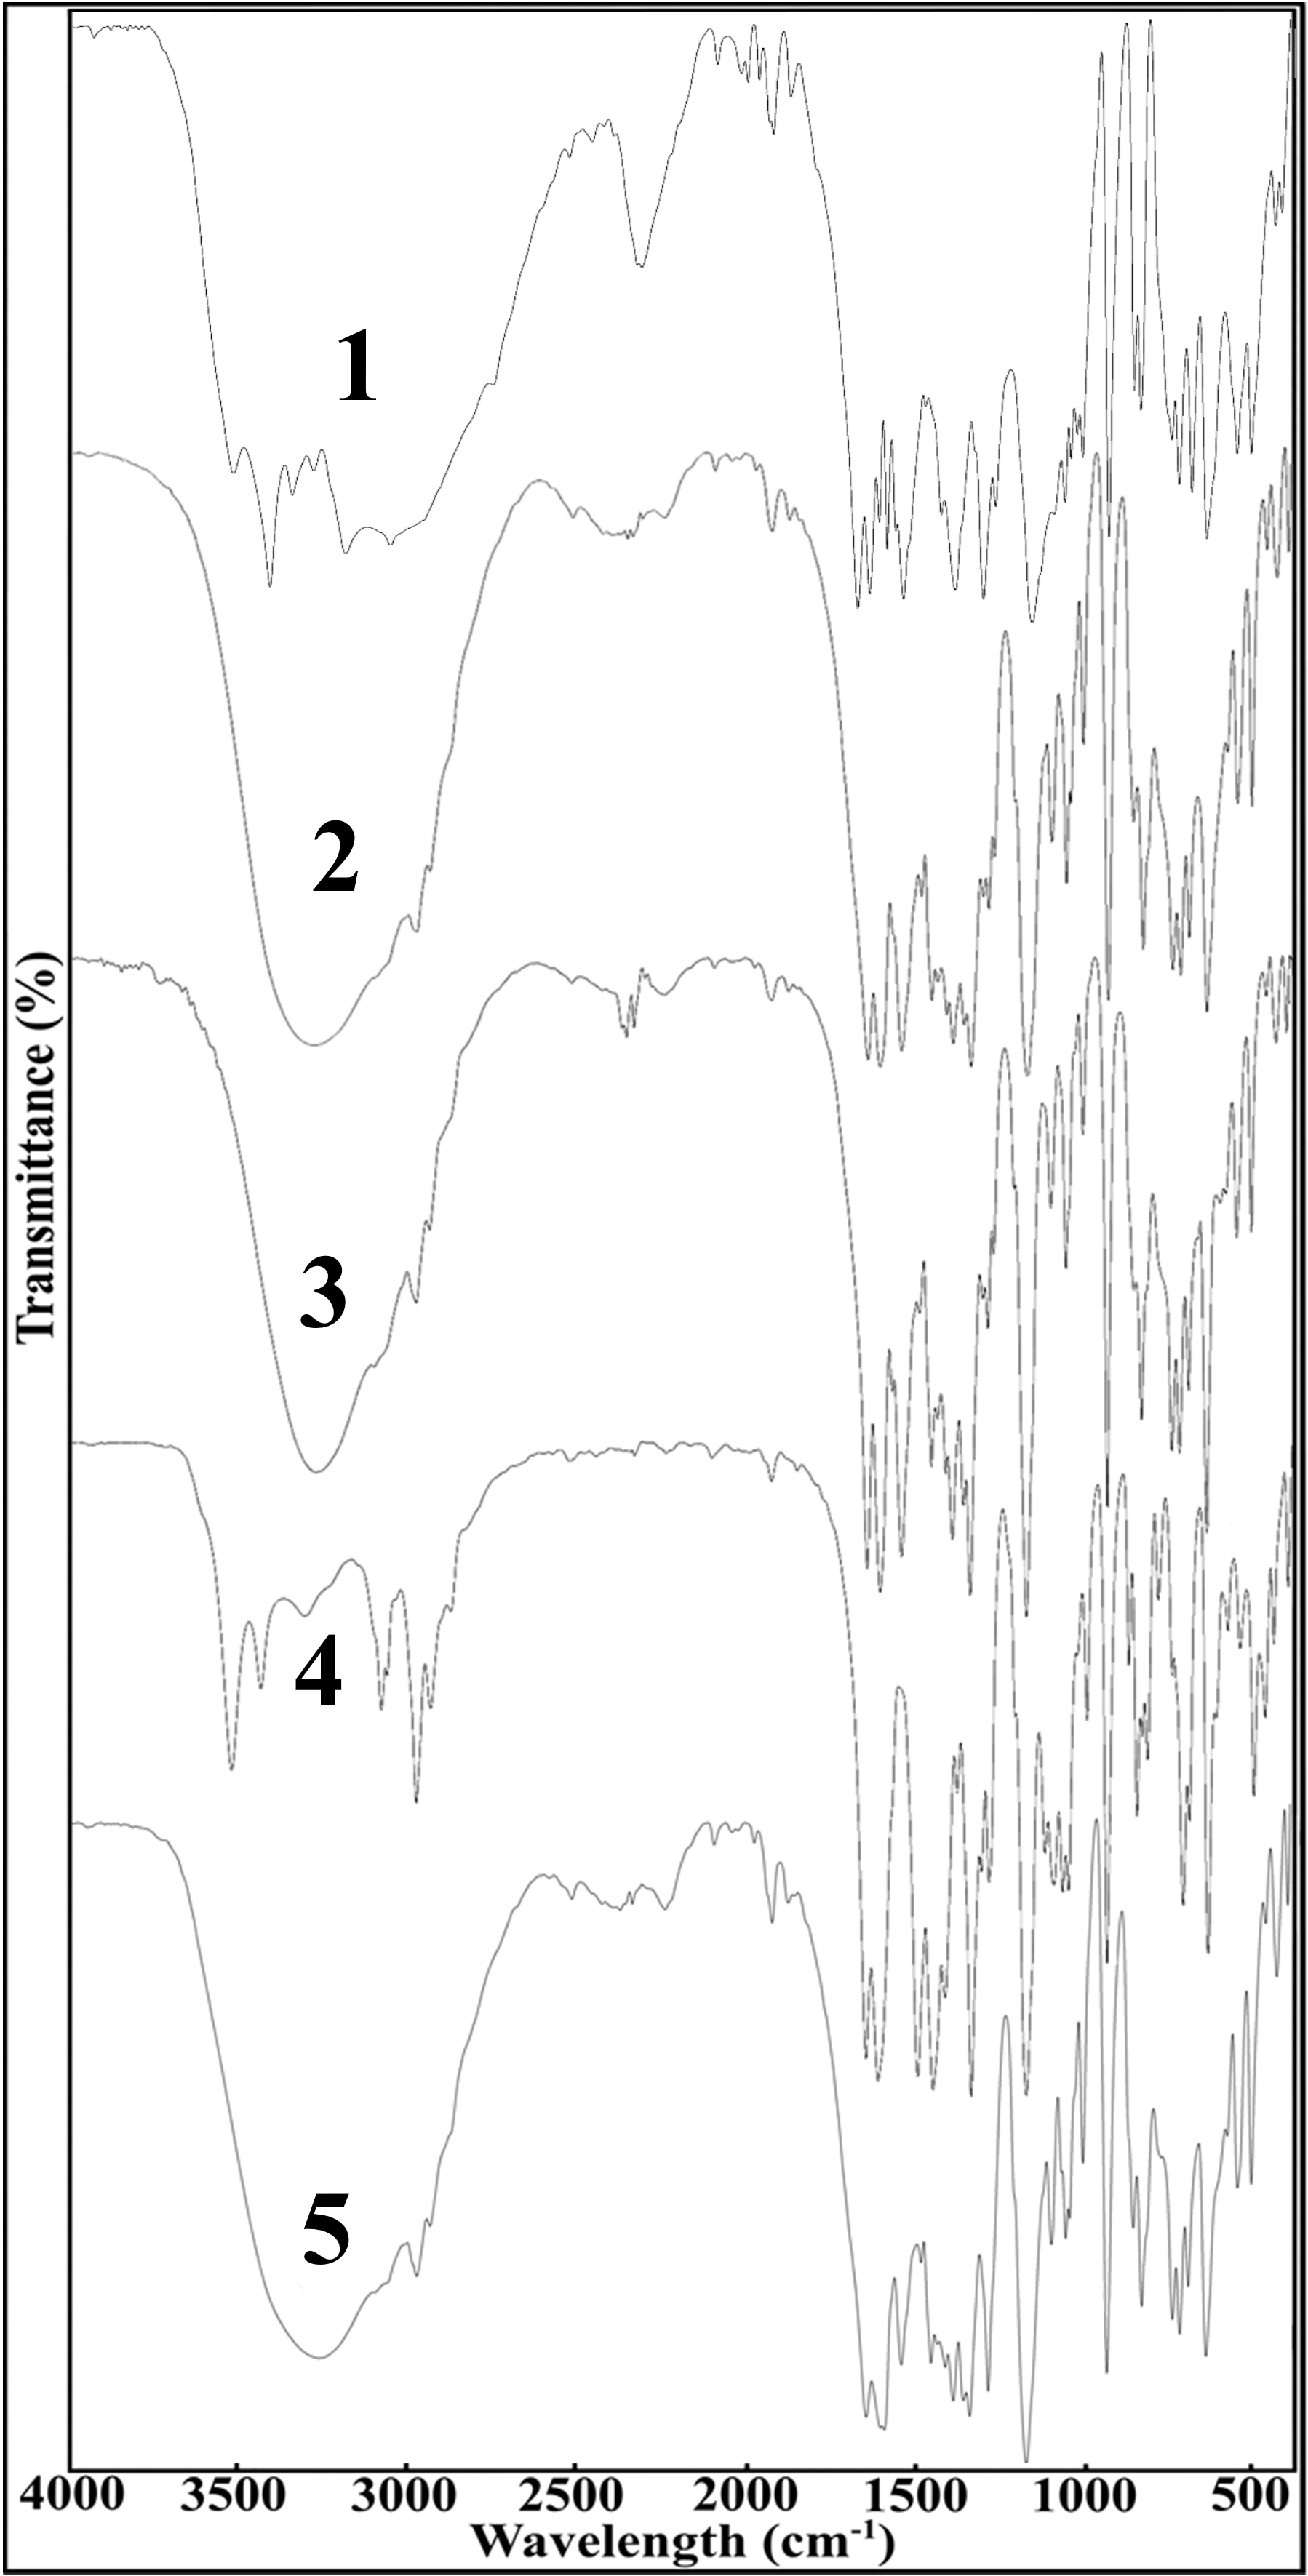


Figure S1. FT-IR spectra of compounds. (**1**) MnII, (**2**) CoII, (**3**) NiII, (**4**) CuII, (**5**) ZnII.

**
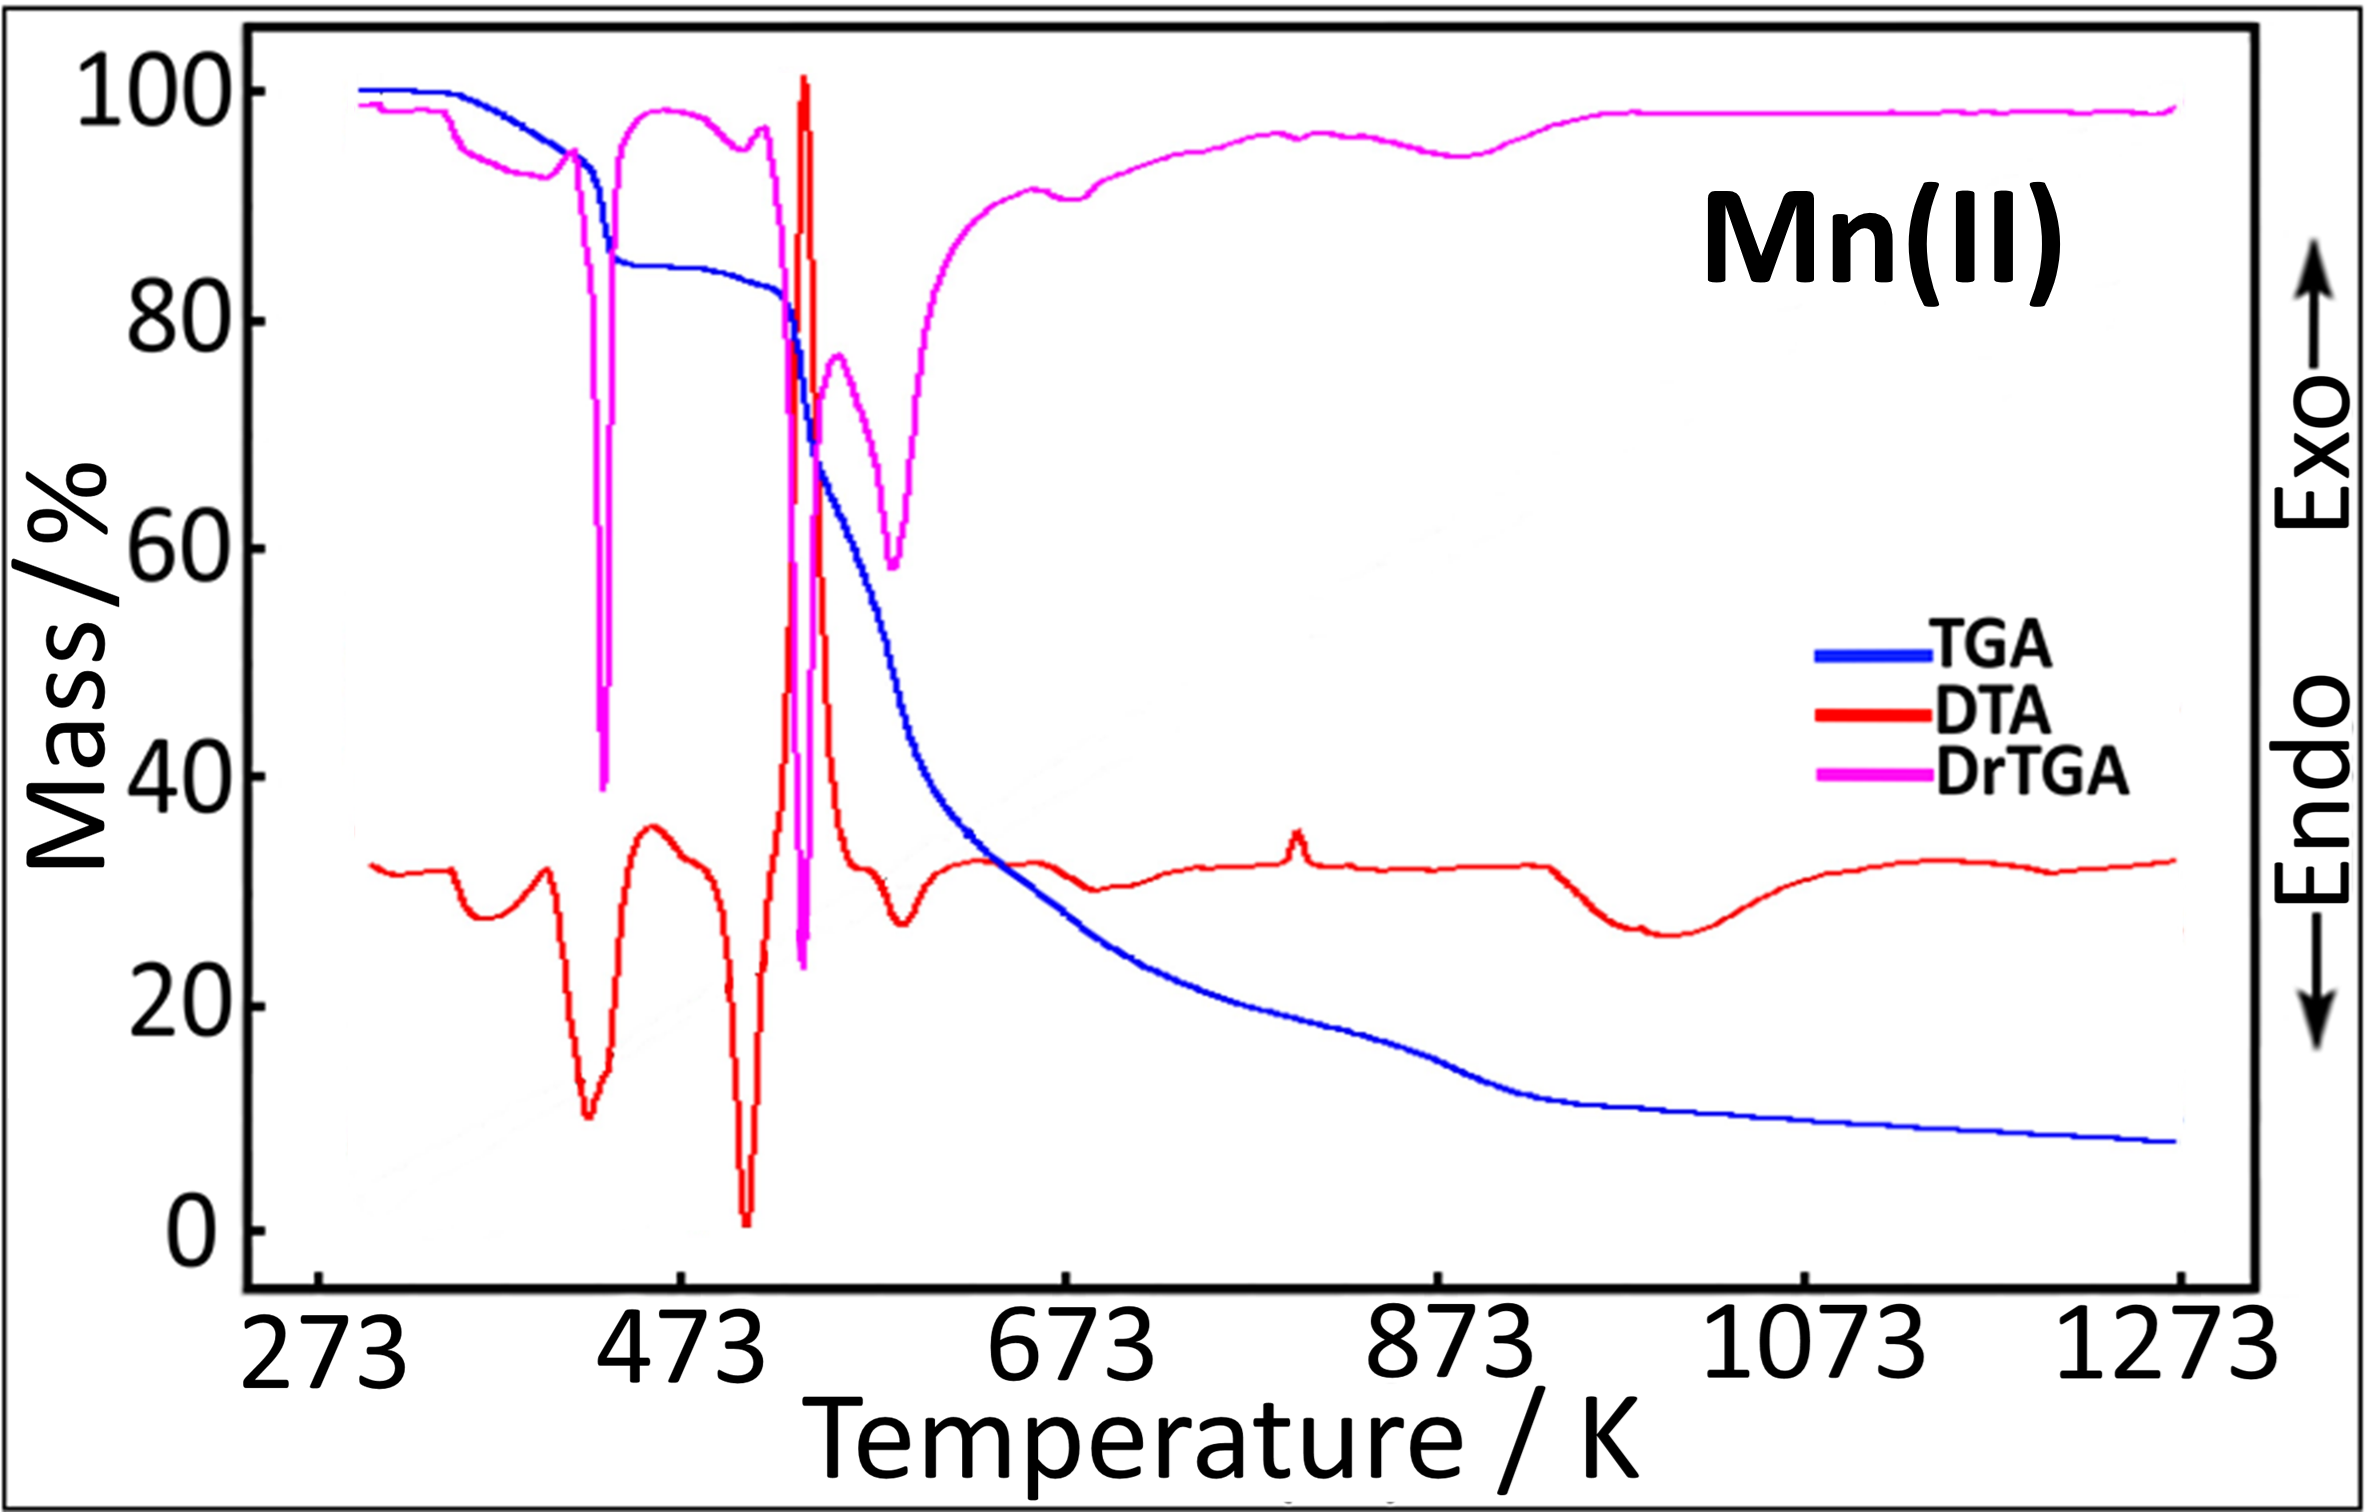

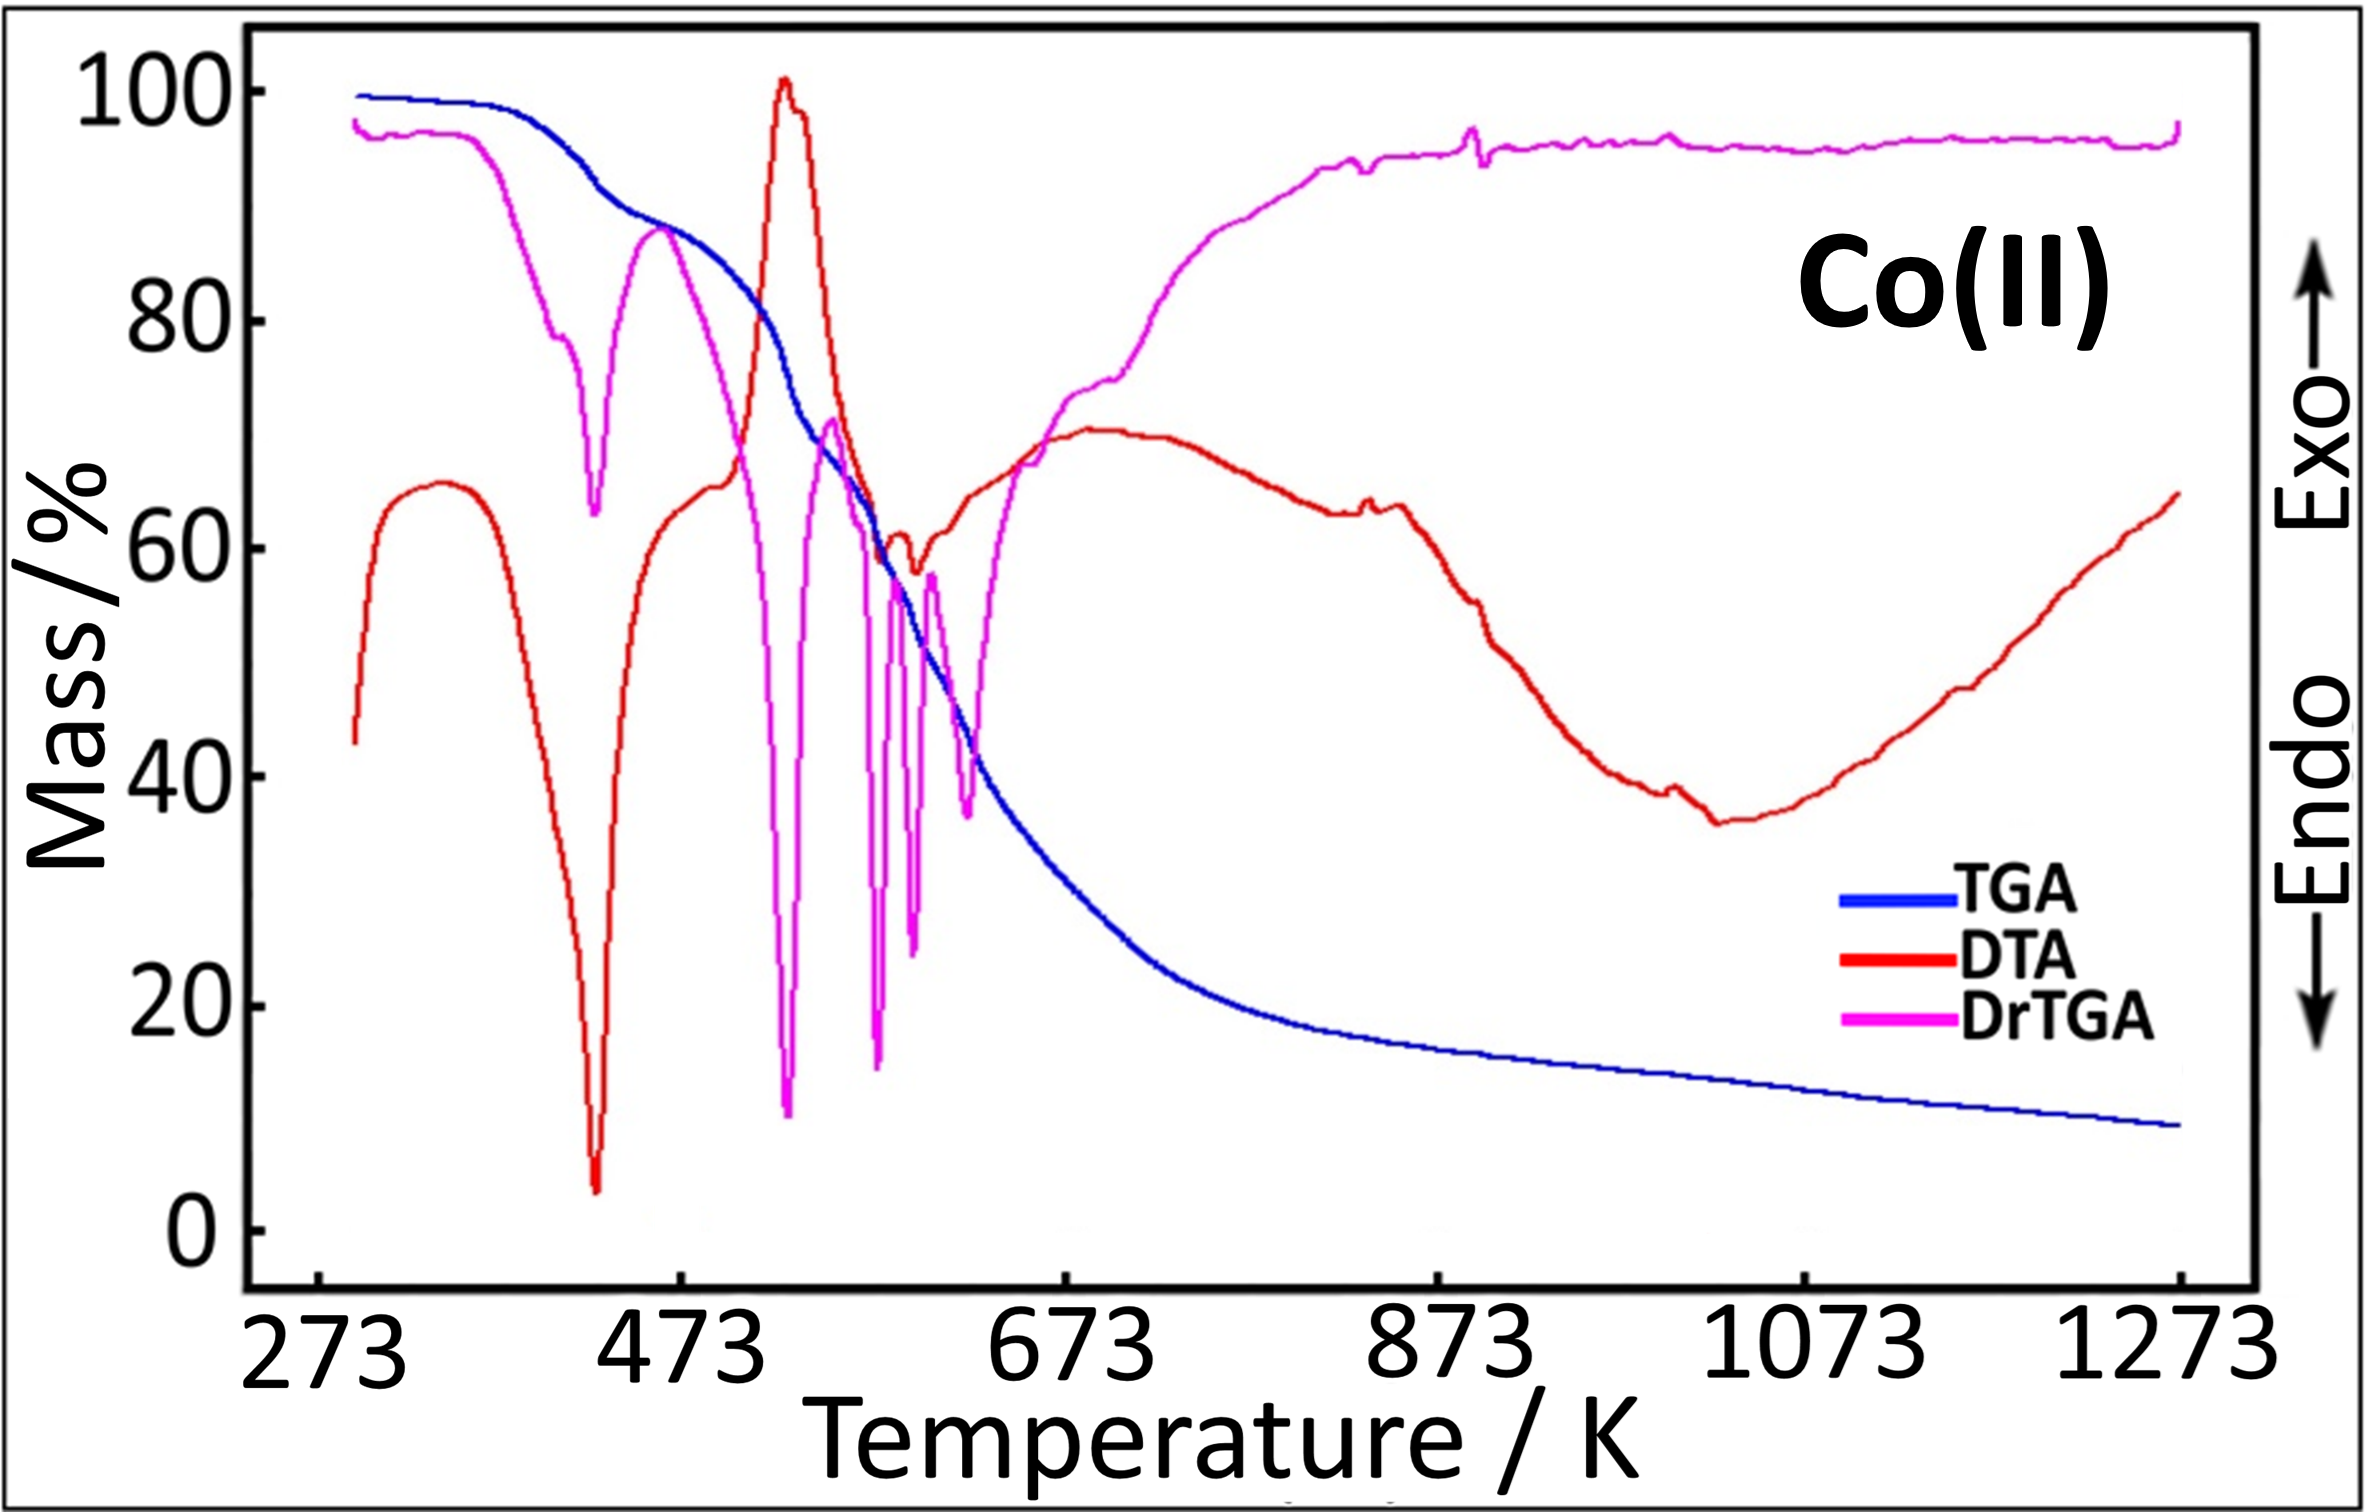

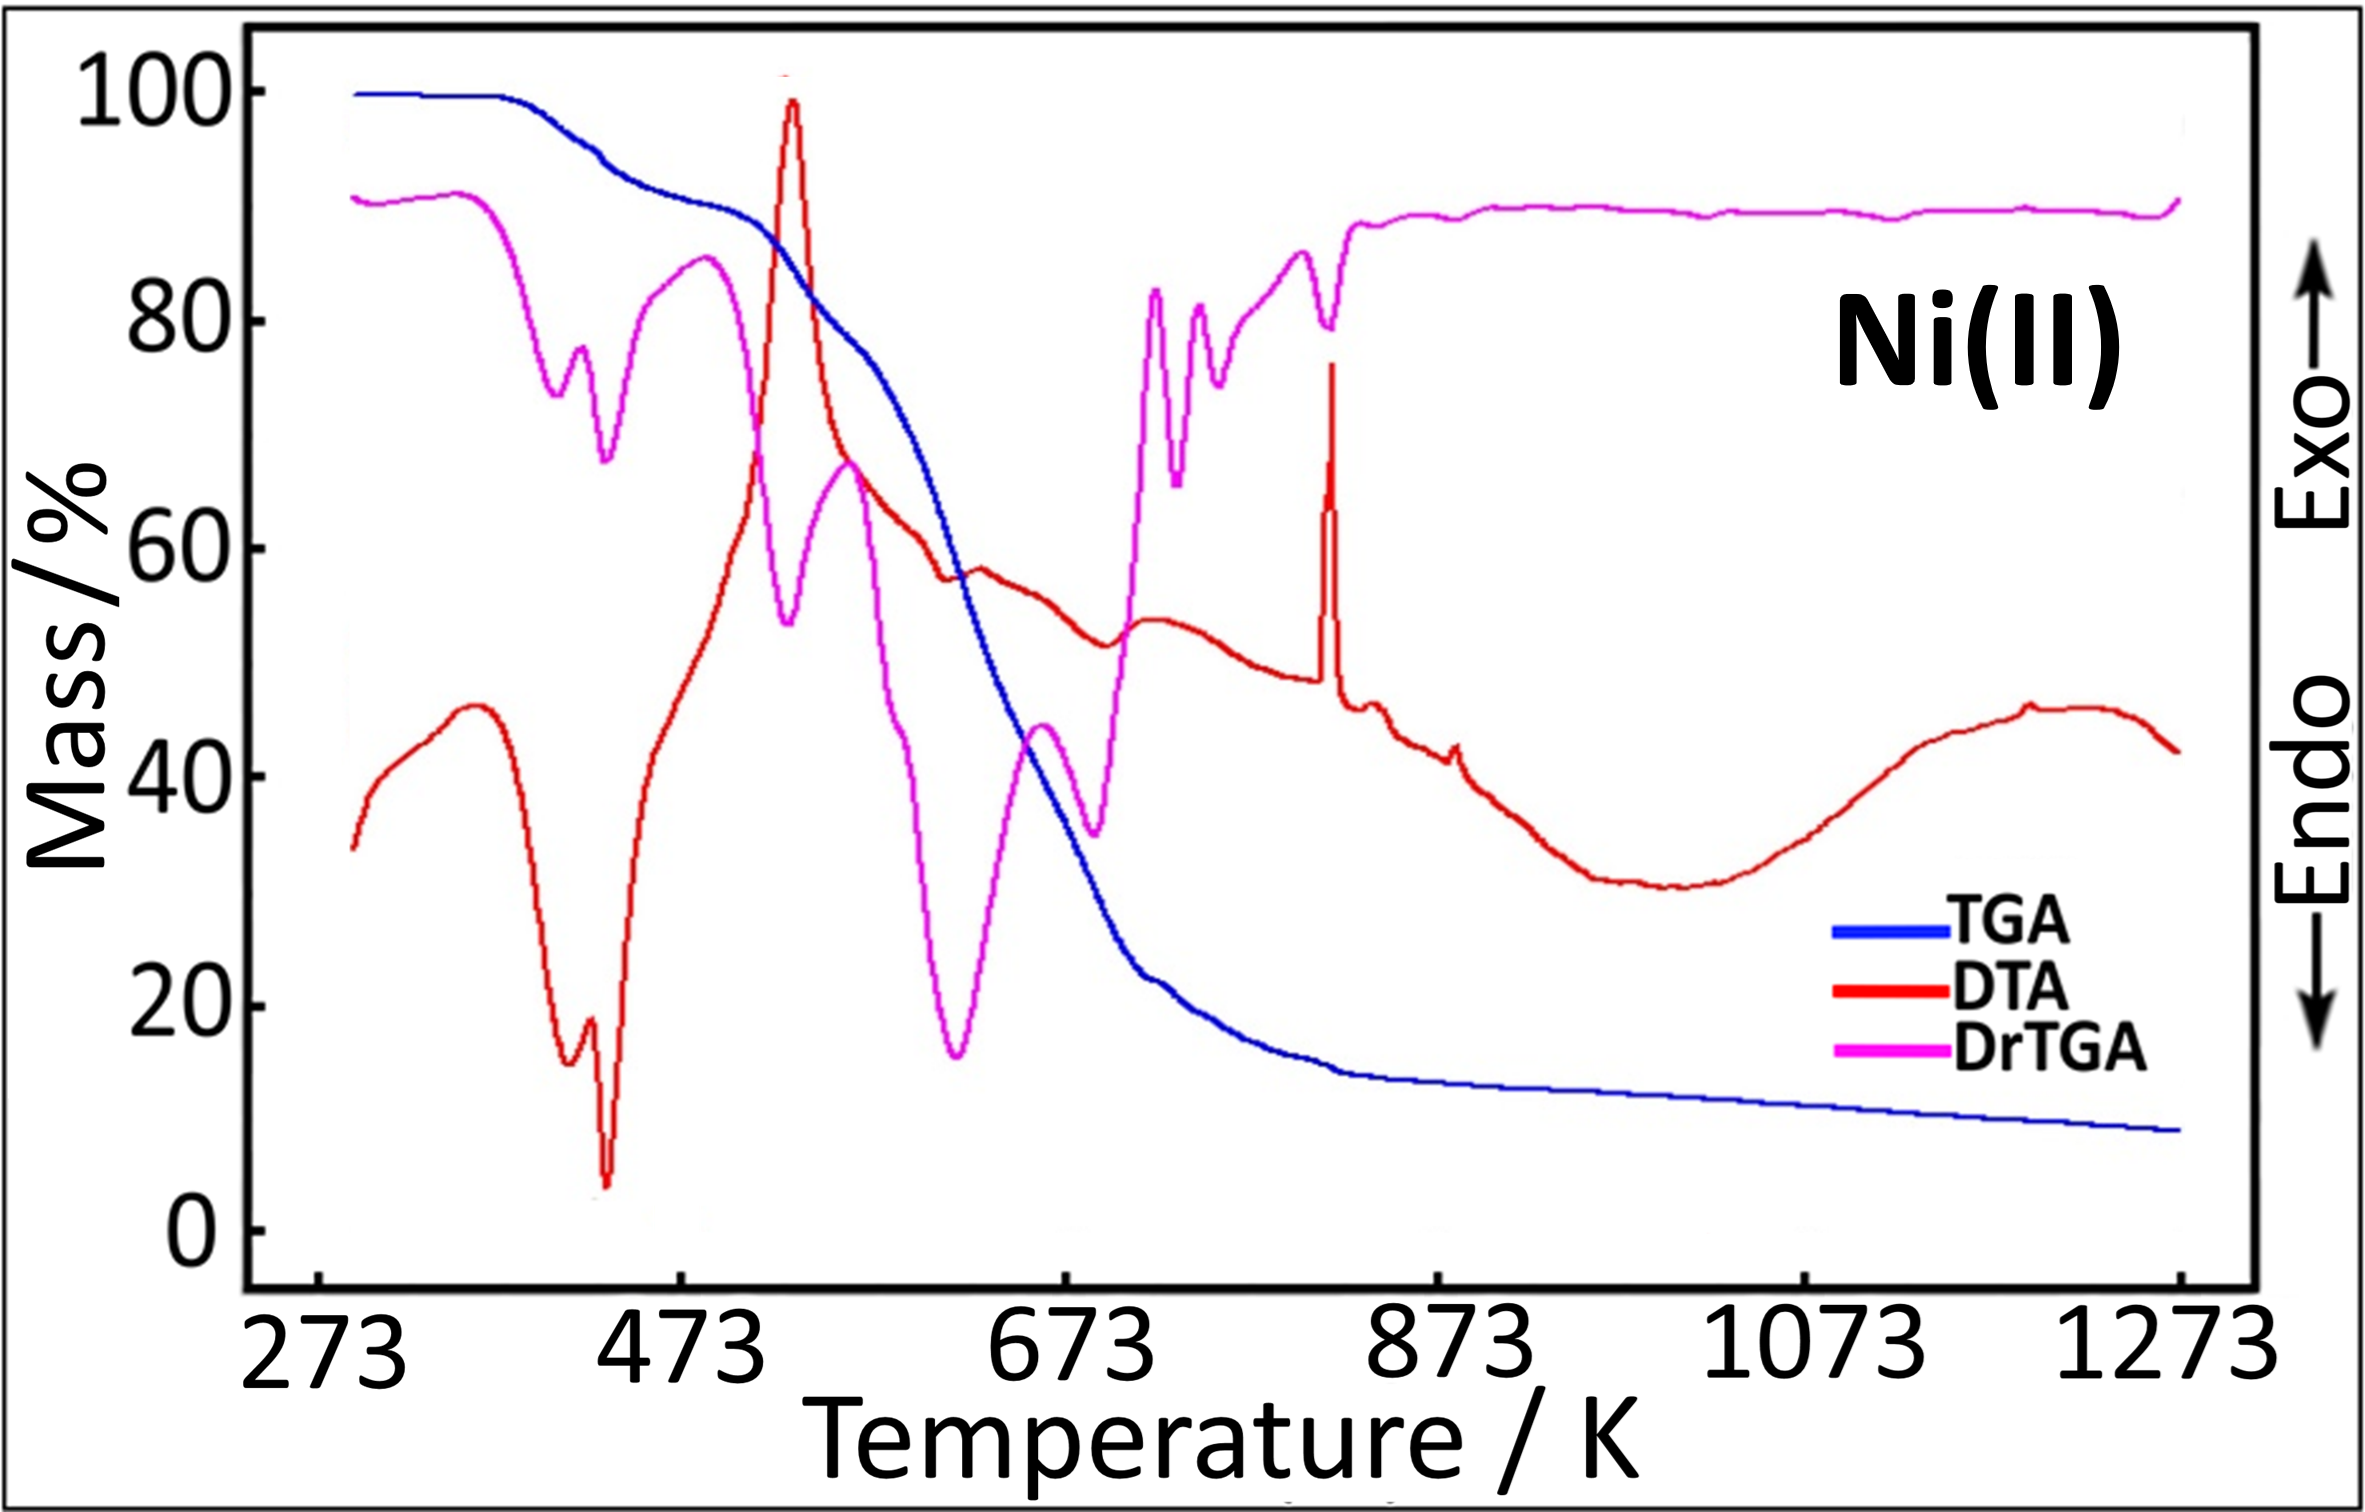

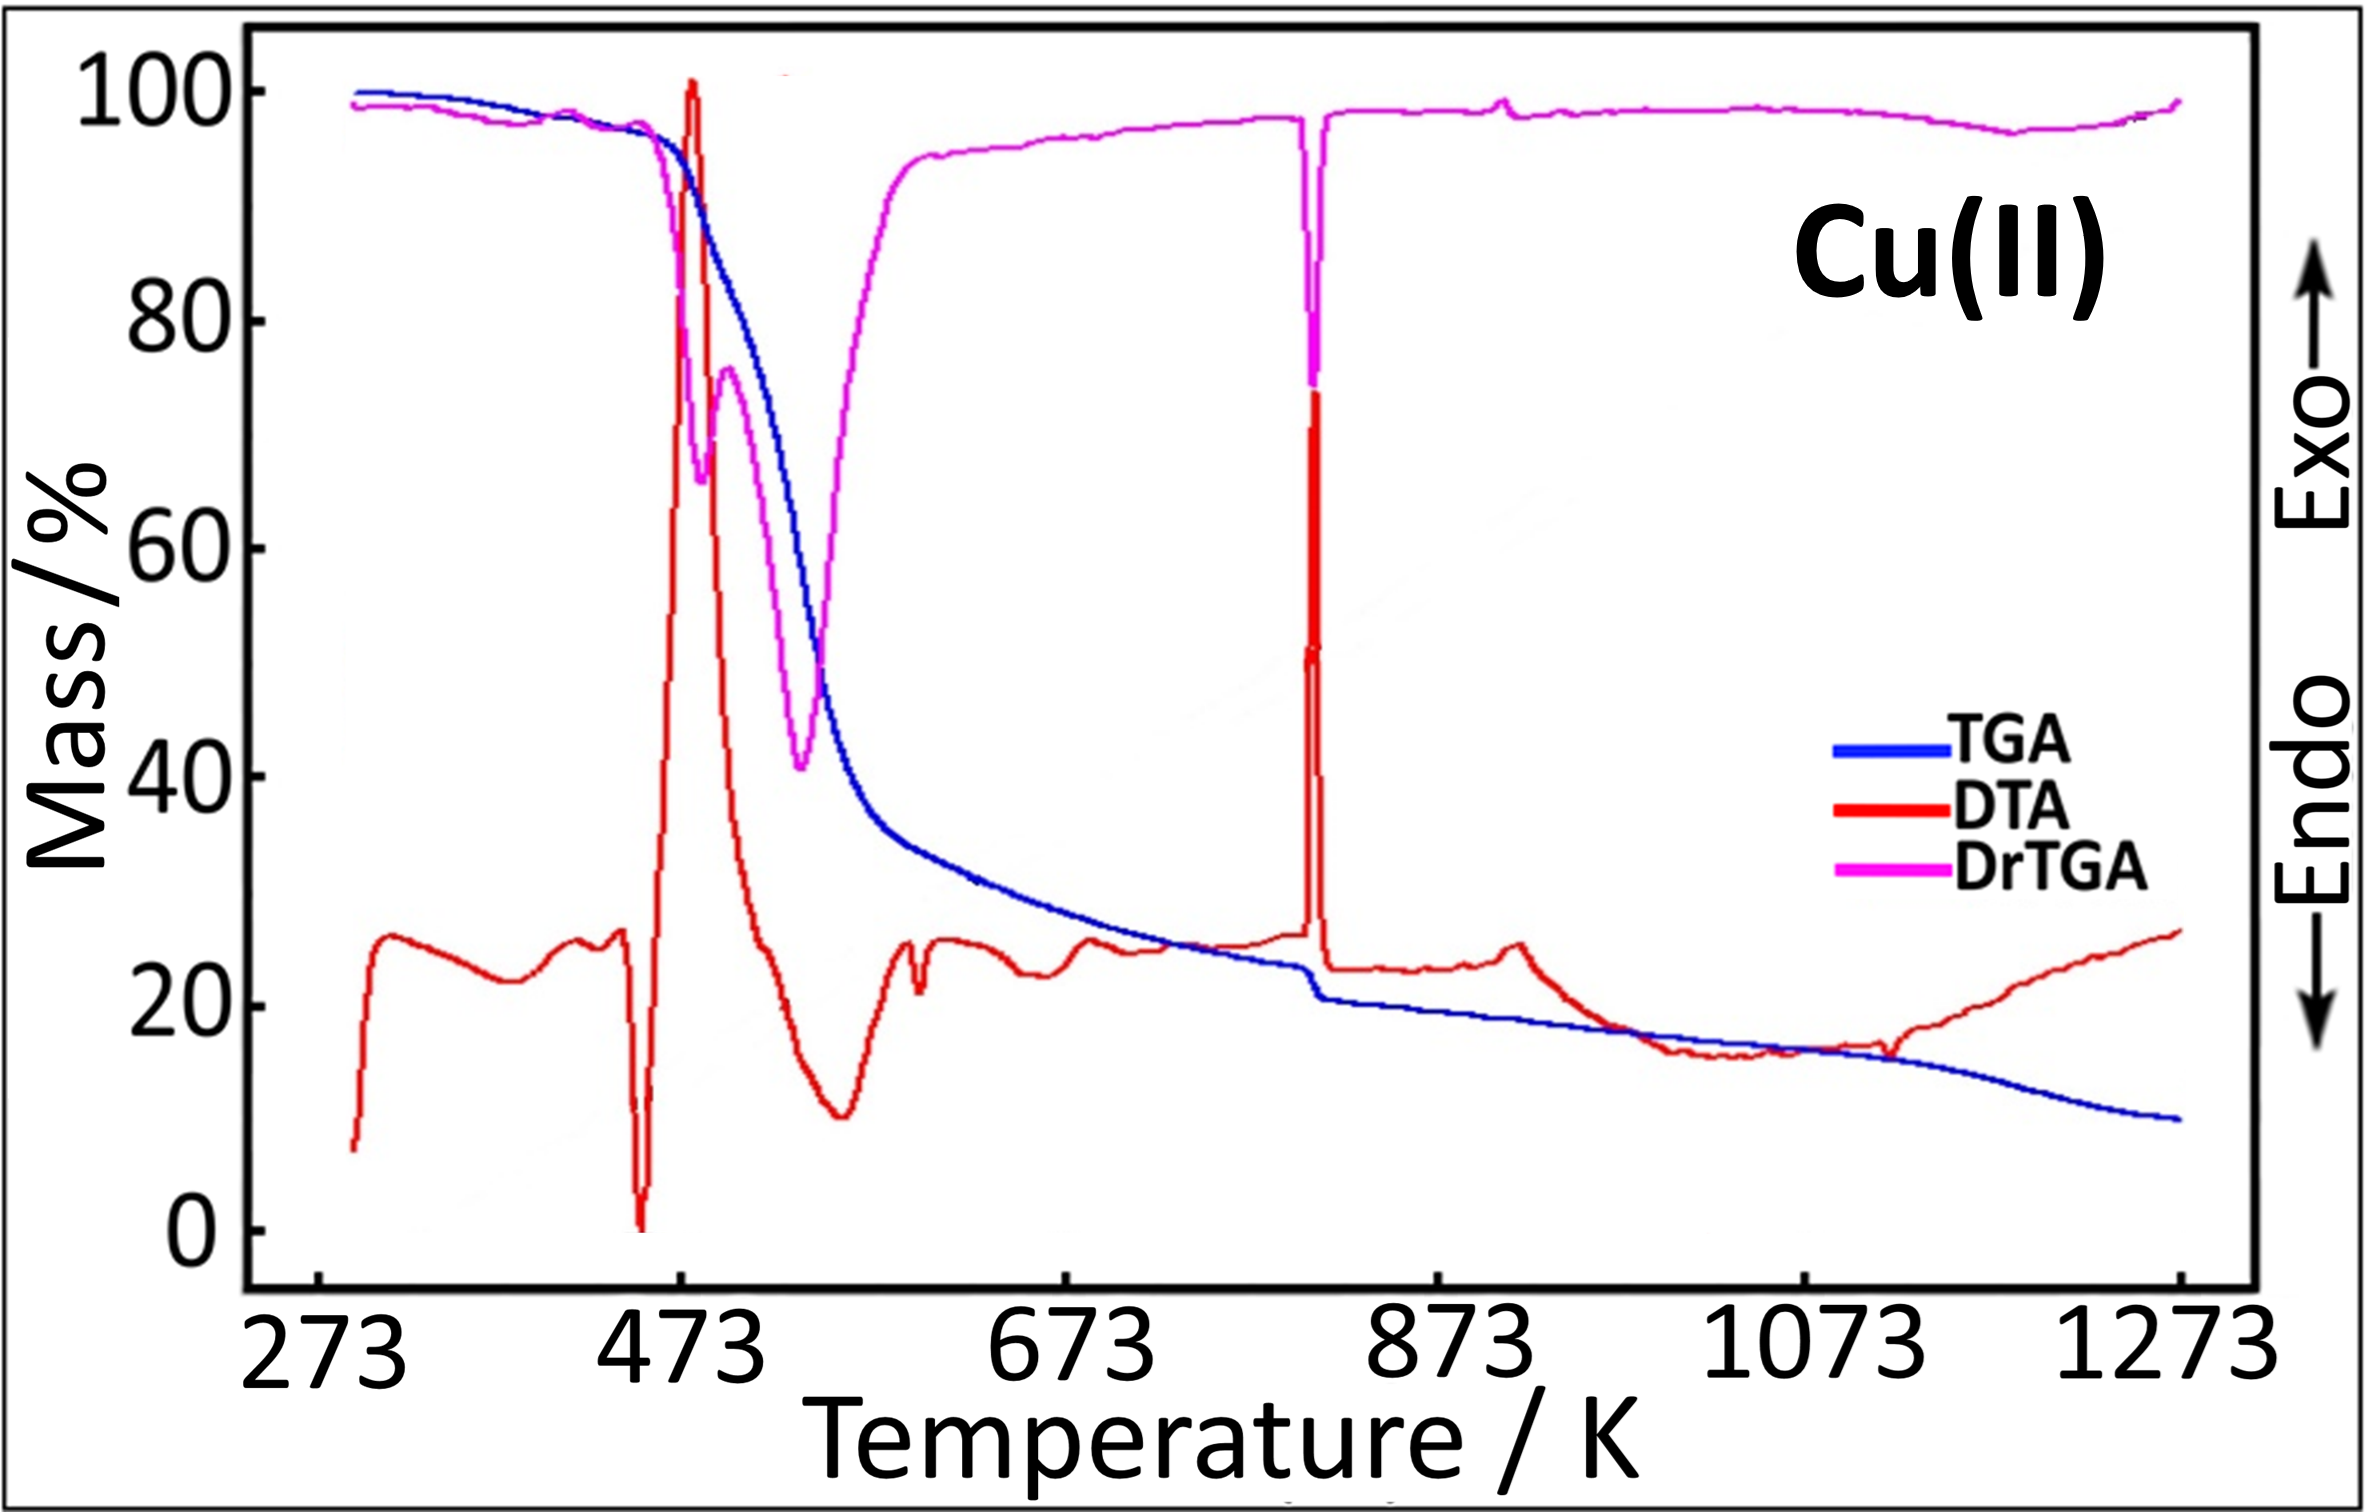
**

**
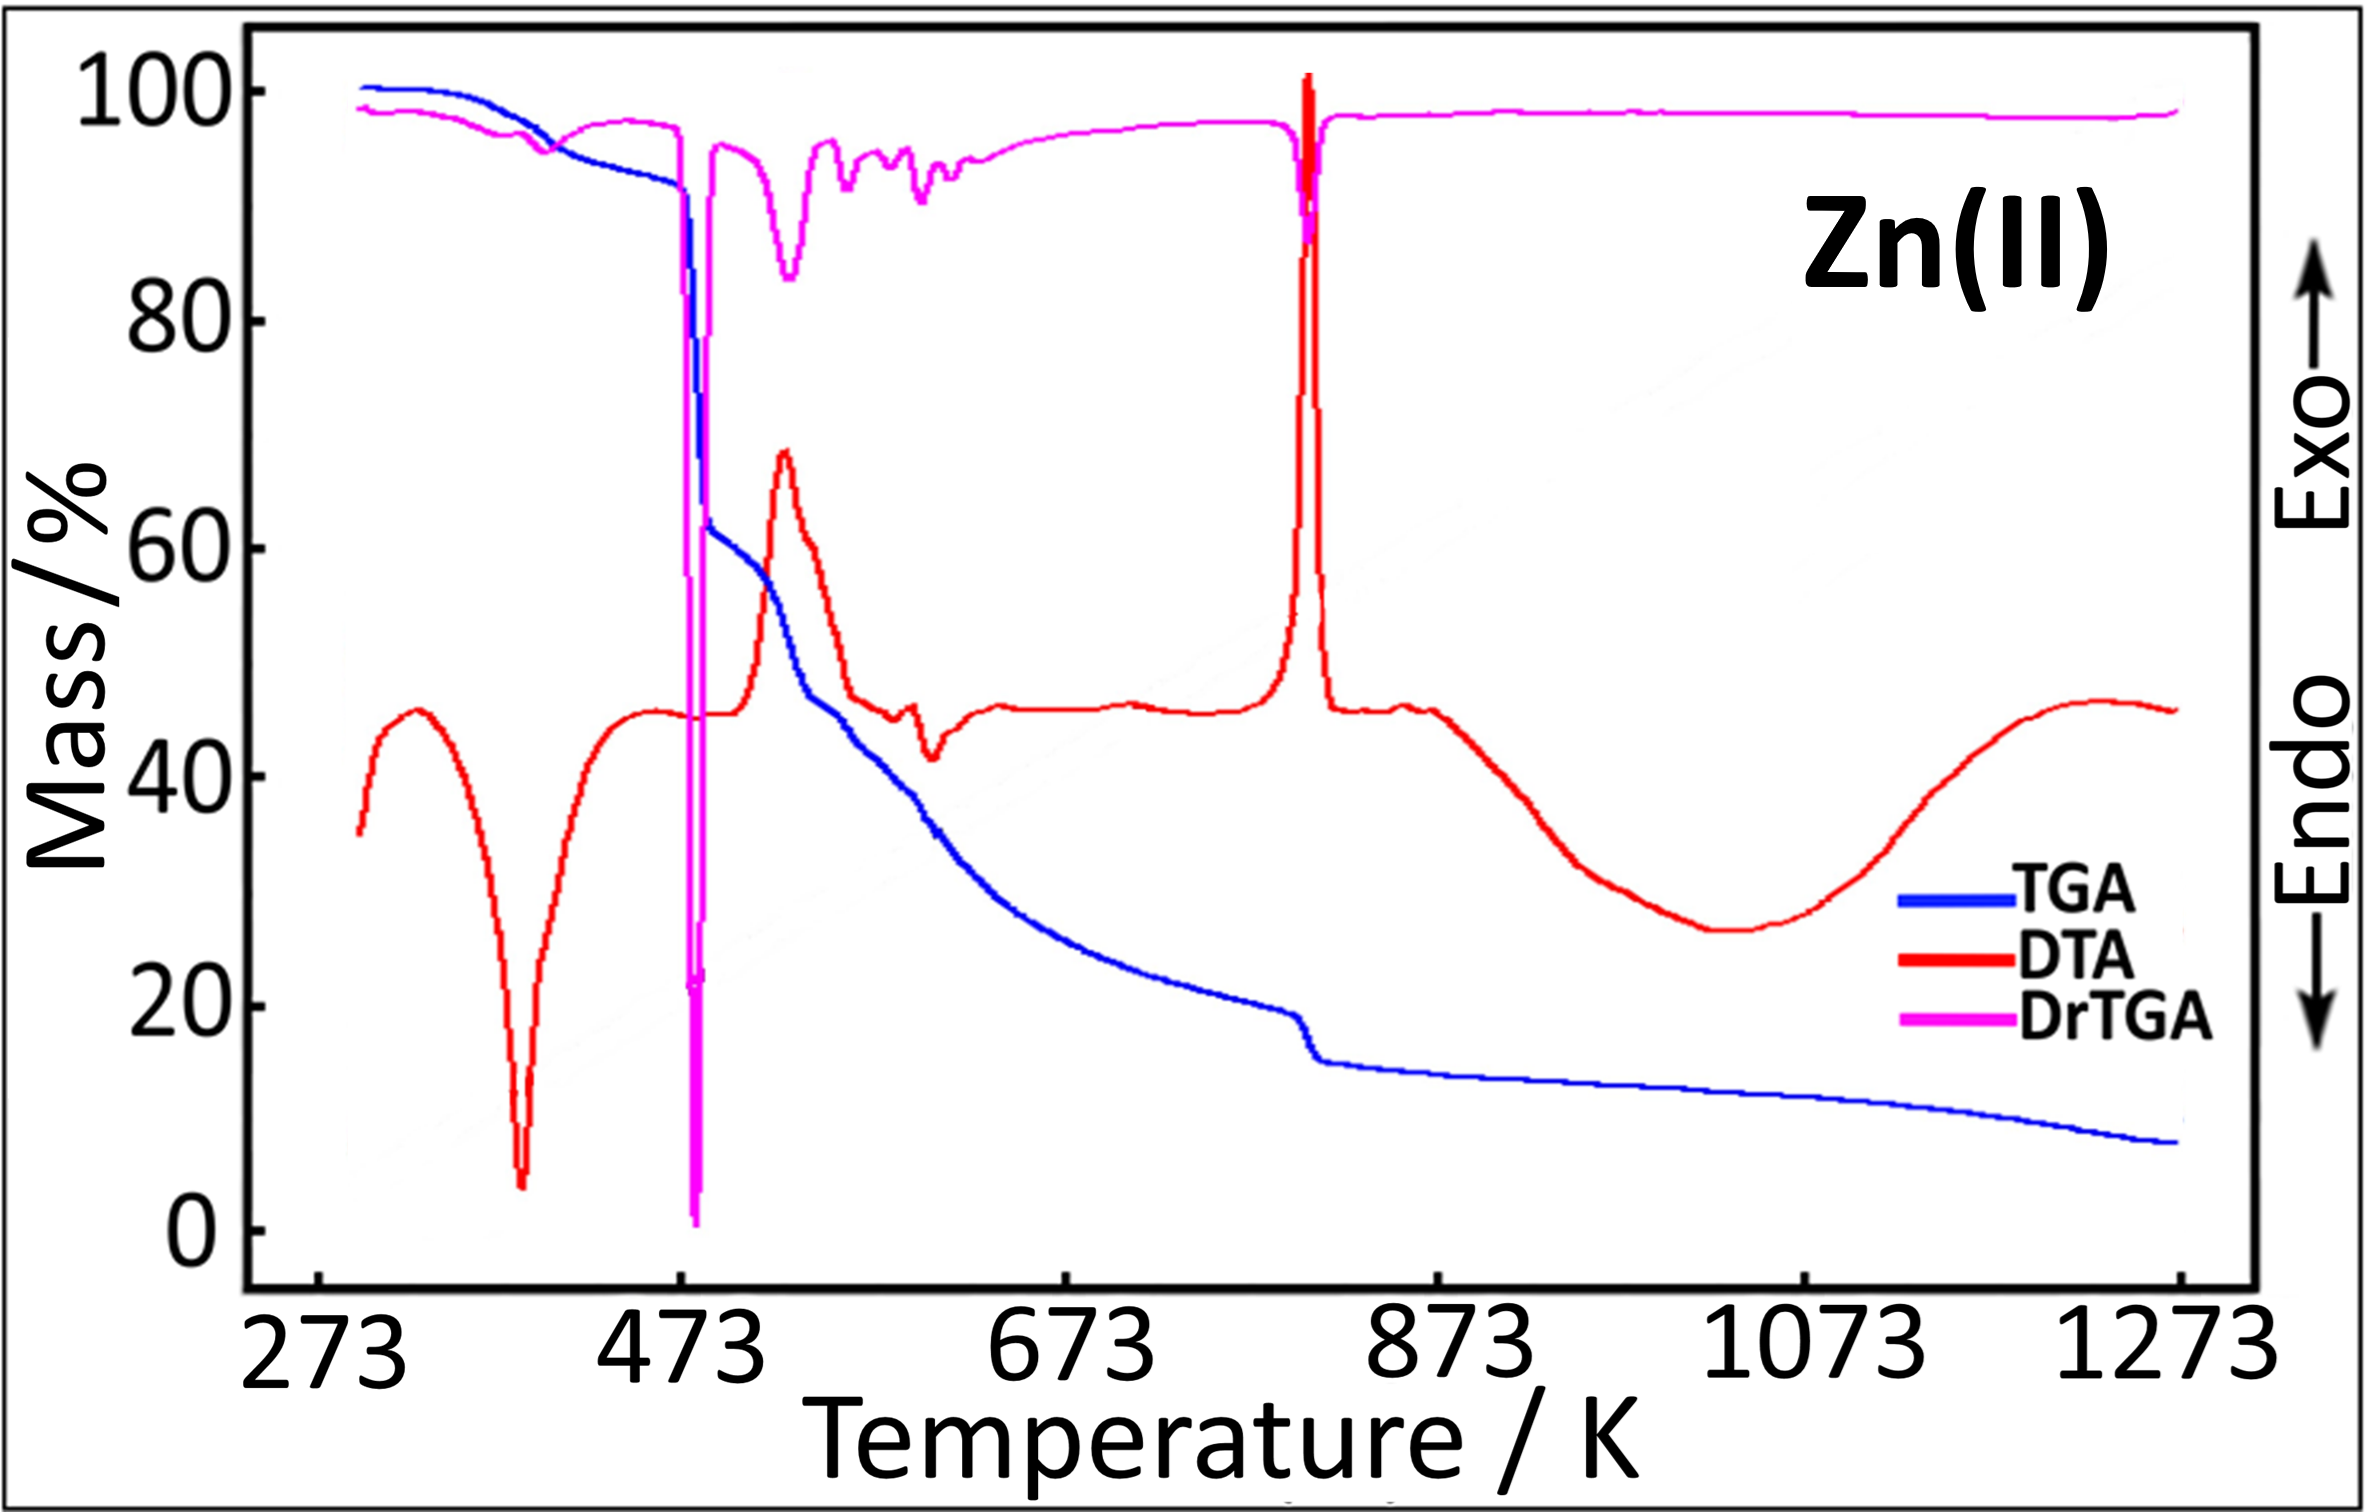
**

Figure S2. TGA/DTA/DrTGA curves of complexes.


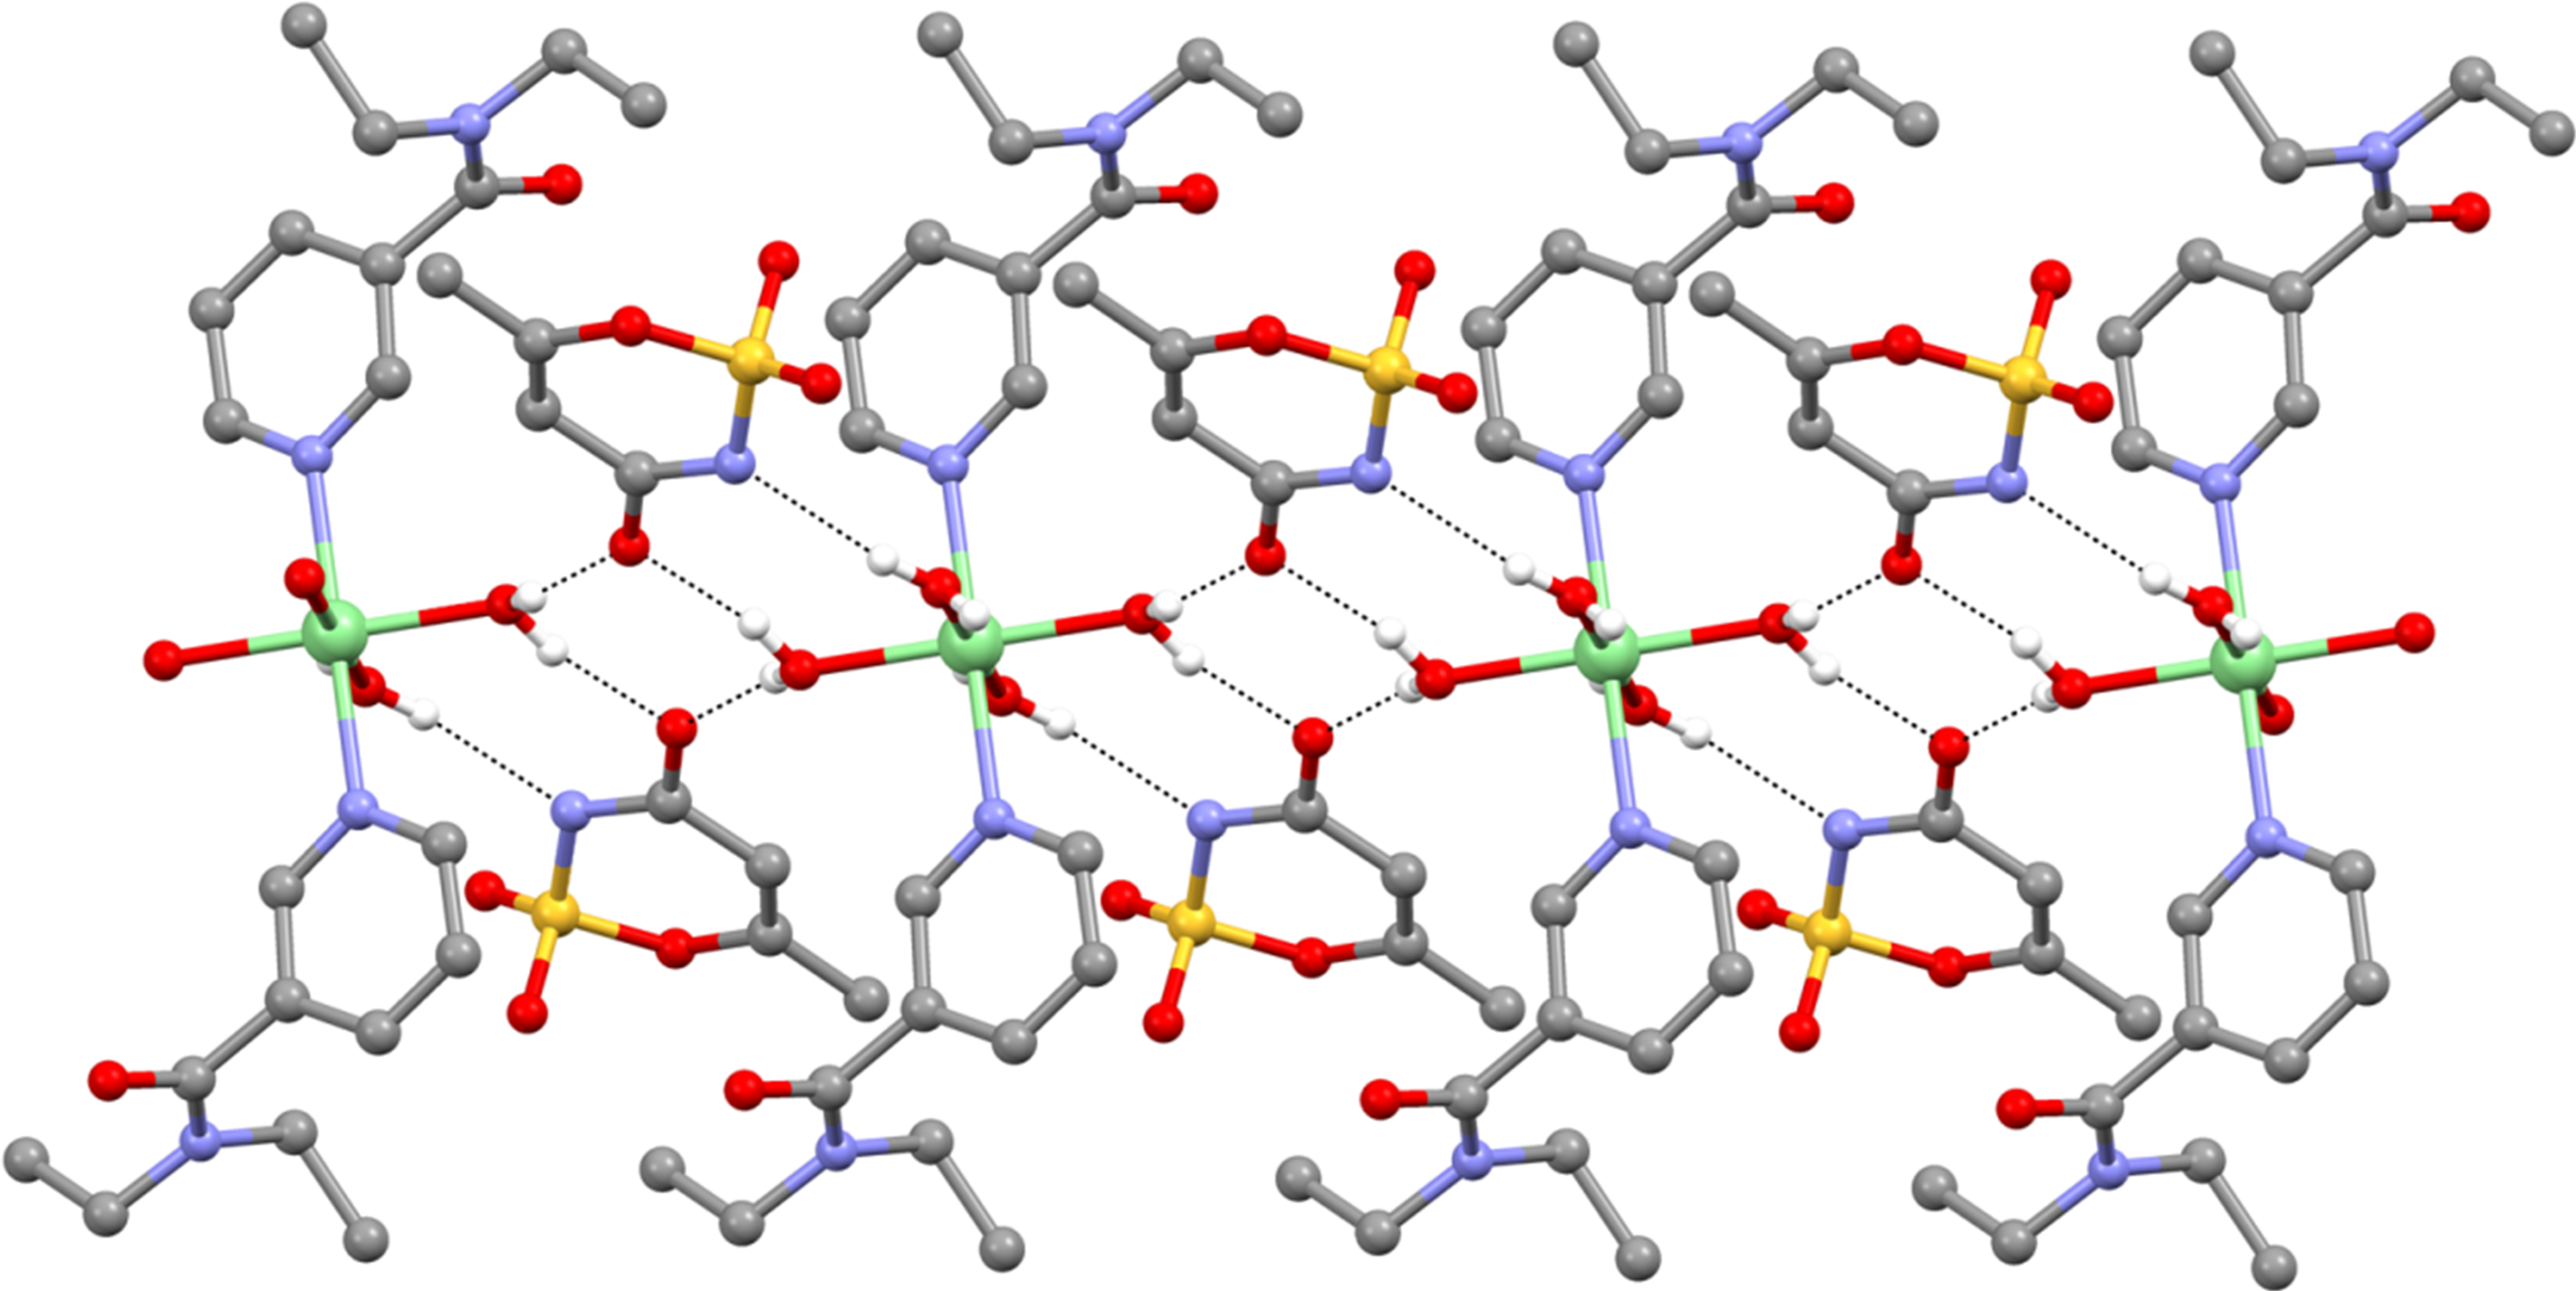


Figure S3. The formation of edge-fused R22(8) and R42(8) rings in **1**, **2** and **5**.


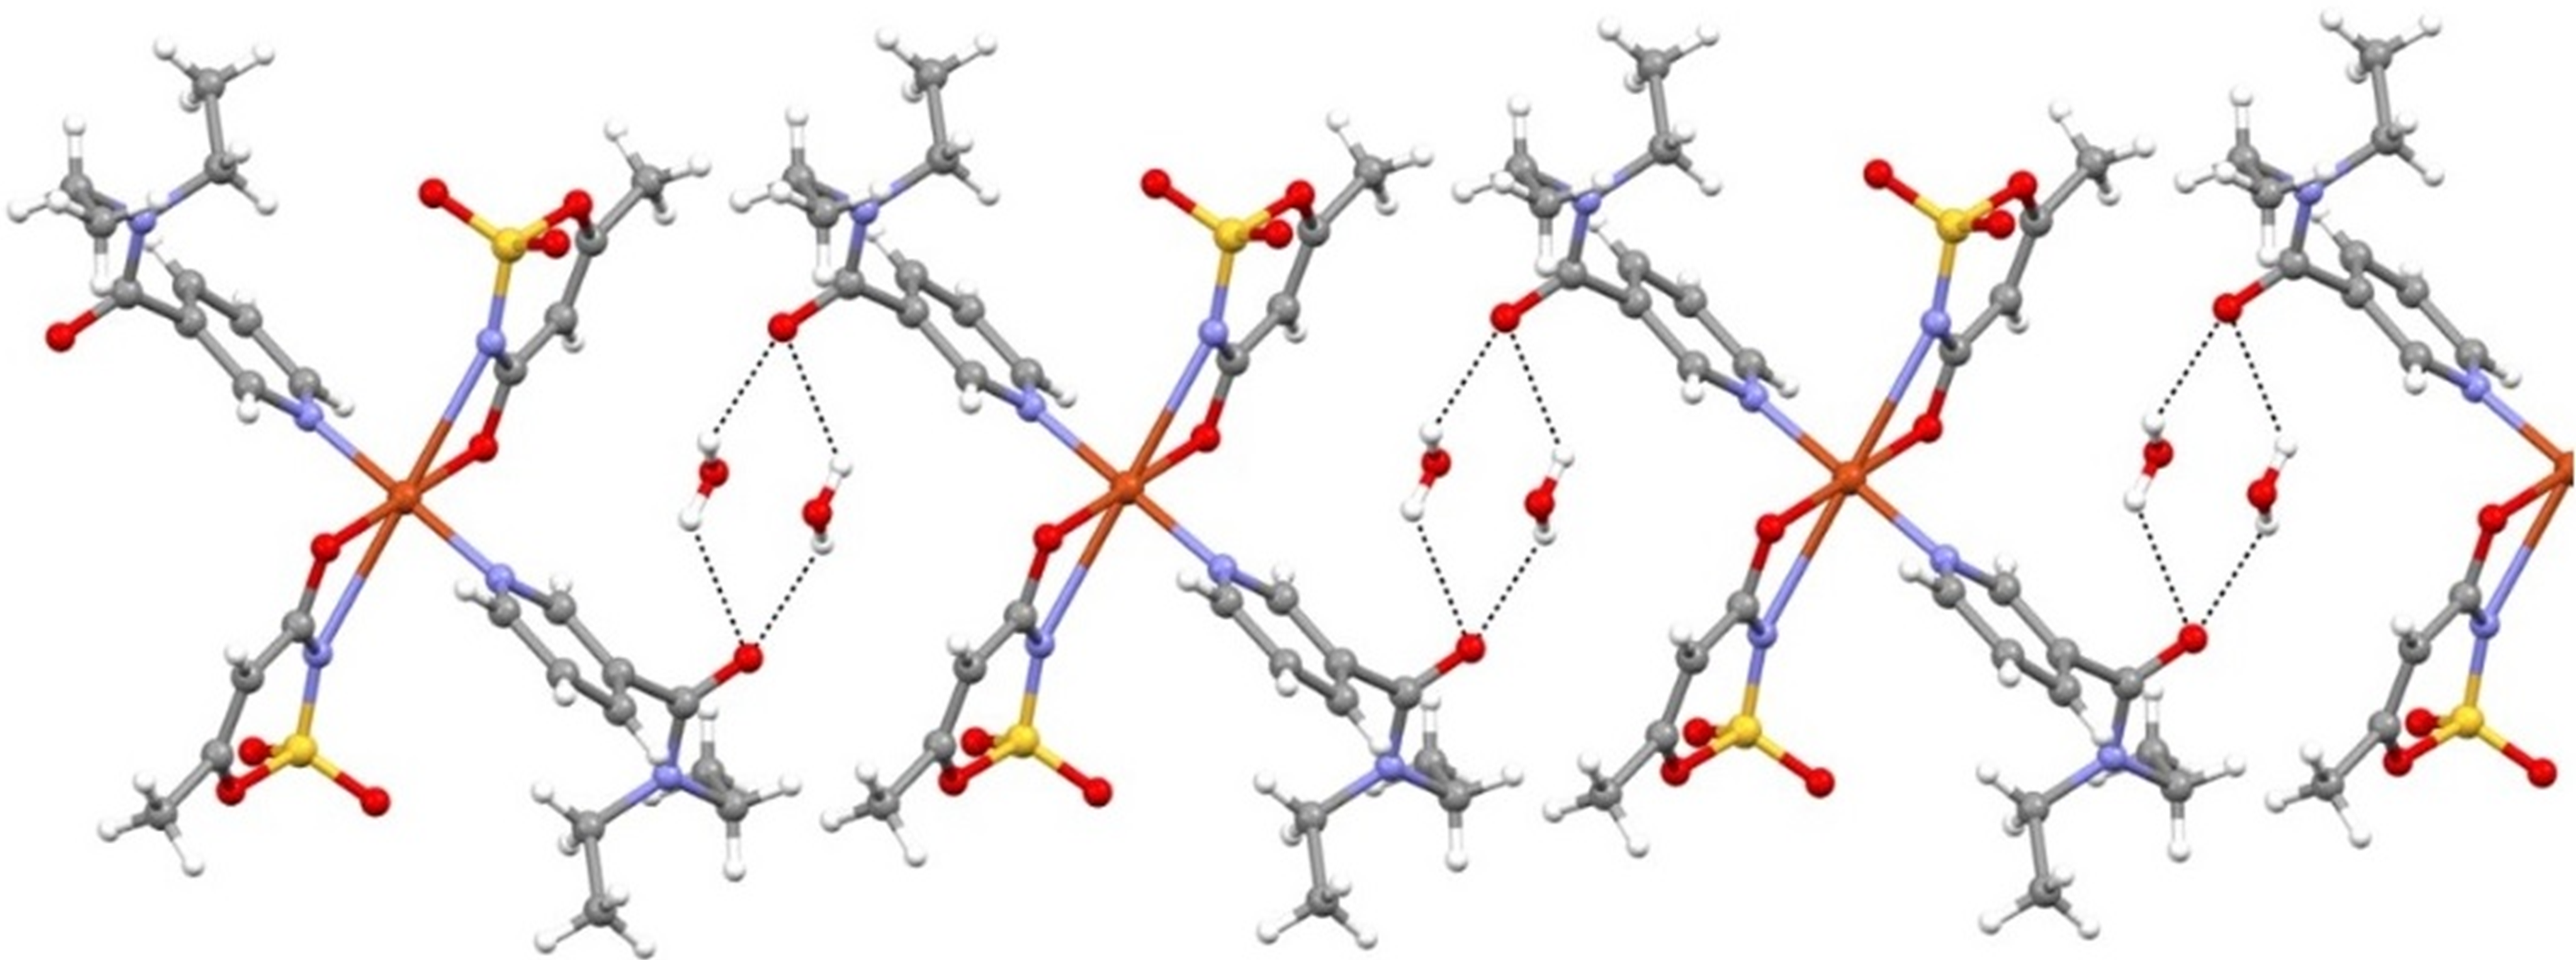


Figure S4. The formation of R42(8) rings in **4**.


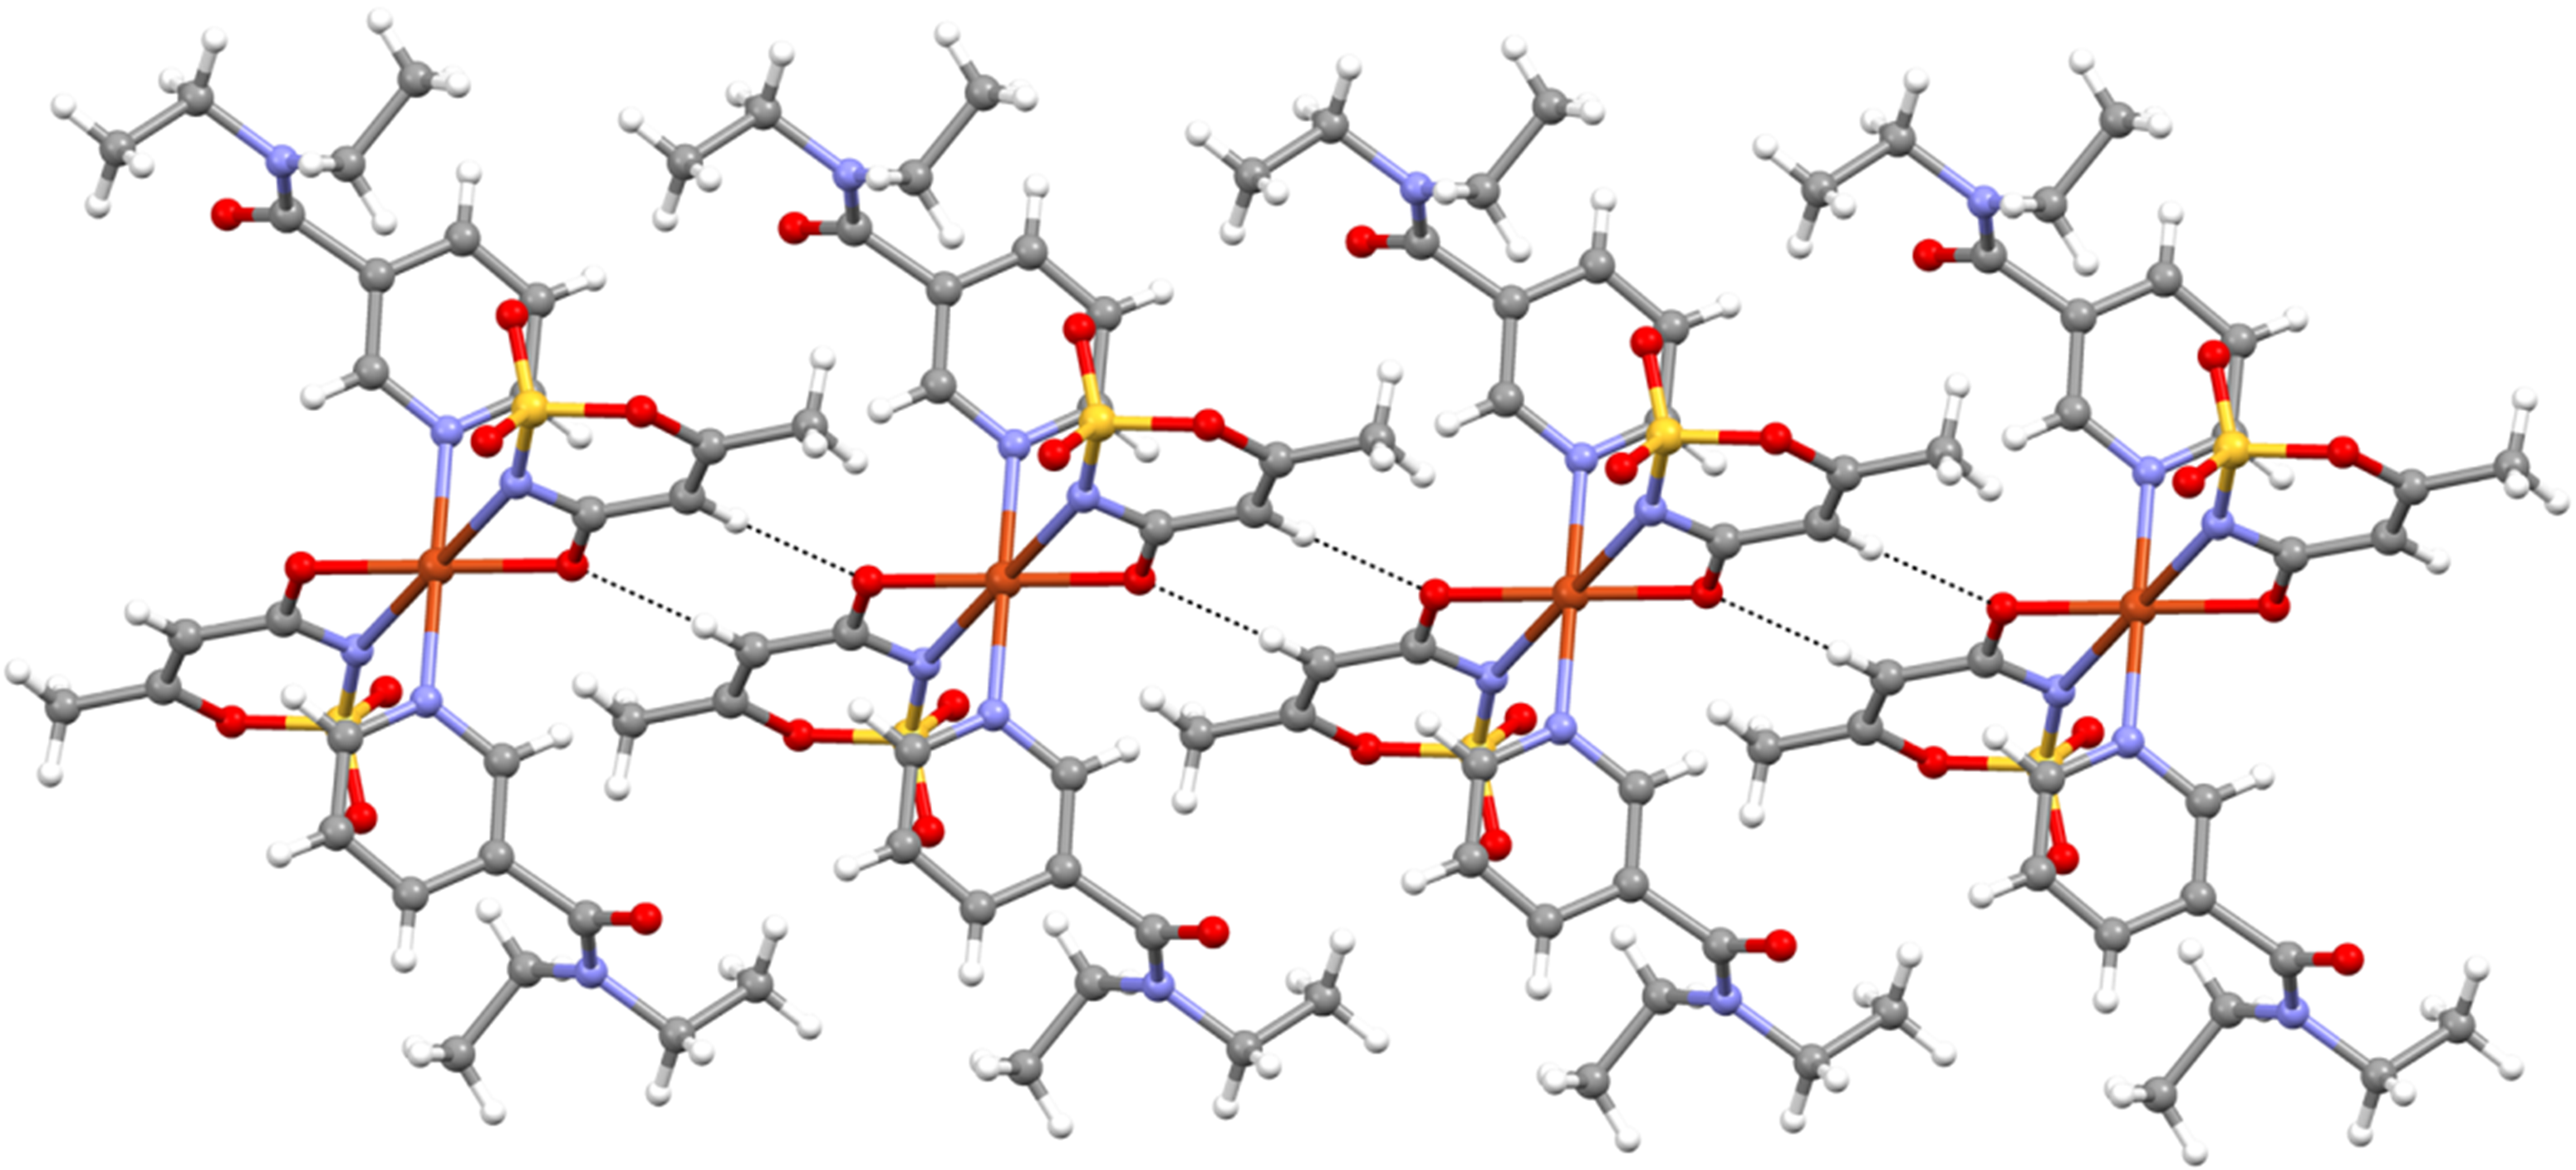


Figure S5. Display of the rings R22(8) formed along the direction in **4** [100].
